# Supplementary material
Source: Springer Nature journal article supplement (https://www.springermedizin.de/resource/supplementary/12955_2012_1025_MOESM3_ESM.pdf/9558674)

**(A)**

MS patients newly enrolled in  
TOUCH prescribing program

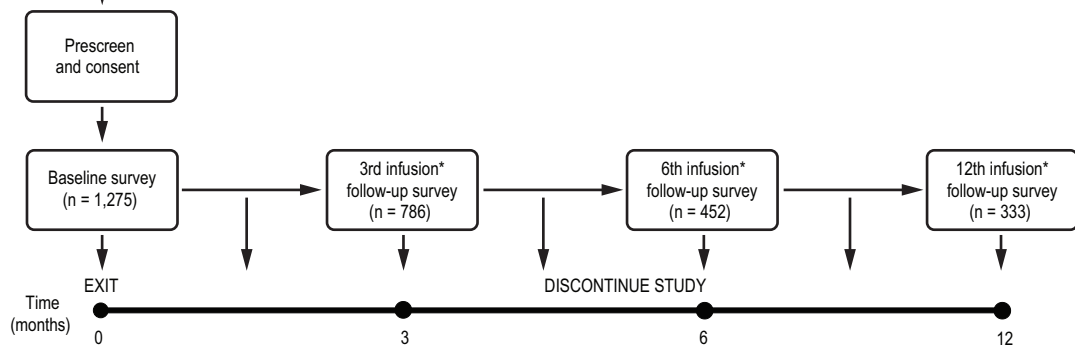**(B)**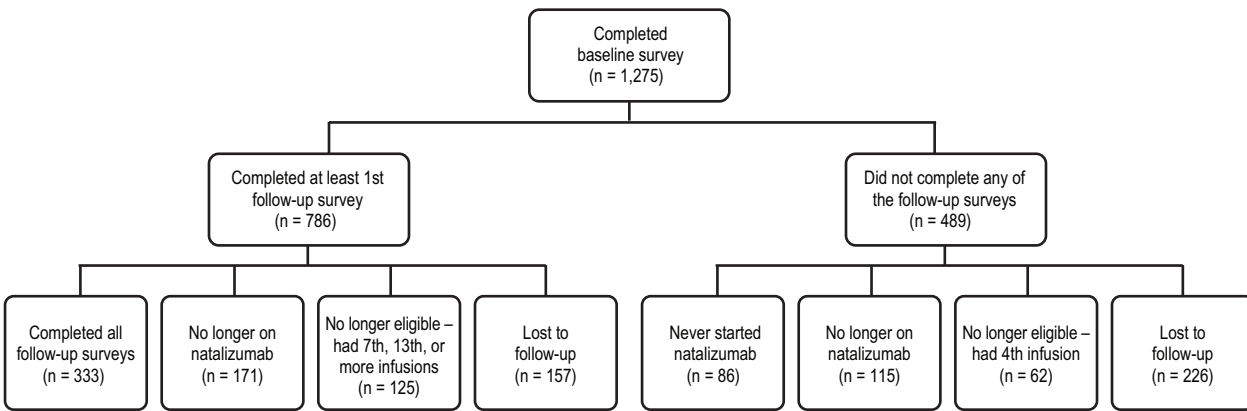

Supplement: MOESM3 [file 9558674]
